# Supplementary material for: Genome-Wide Pleiotropy Study Identifies Association of PDGFB with Age-Related Macular Degeneration and COVID-19 Infection Outcomes
Source: MDPI journal article supplement (doi:10.3390/jcm12010109), 2022-12-23
Supplement: s1 [file s1]

**Table S1.** Overview of the publicly available summary-level data of genetic associations used for the analysis.

| Phenotype | Description                      | Sample Size | Cases  | Controls  | Population | PMID     |
|-----------|----------------------------------|-------------|--------|-----------|------------|----------|
| AMD       | AMD cases vs controls            | 33,976      | 16,144 | 17,832    | EUR        | 26691988 |
| COVID-19  | Critical Covid vs population     | 1,388,342   | 5,101  | 1,383,241 | EUR        | 34237774 |
|           | Hospitalized Covid vs population | 1,887,658   | 9,986  | 1,877,672 |            |          |
|           | Covid infection vs population    | 1,683,768   | 38,984 | 1,644,784 |            |          |

PMID: PubMed accession ID.

**Table S2.** Sample demography of gene expression dataset derived from 96 peripheral blood samples obtained from 32 COVID-19 patients and 8 controls at multiple time points, corresponding to different disease stages, measured from symptom onset (early: 19 samples within 10 days; middle: 36 samples between 11 and 20 days; late: 22 samples >21 days or later). This COVID-19 expression data was obtained from Gene Expression Omnibus (GEO; accession ID: GSE161731).

| <b>Age group</b>     | <b>Control</b> | <b>Early</b> | <b>Middle</b> | <b>Late</b>  |
|----------------------|----------------|--------------|---------------|--------------|
| <b>N (Females)</b>   | 19 (8)         | 19 (6)       | 36 (15)       | 22 (11)      |
| <b>Age Mean (SD)</b> | 18.37 (0.6)    | 46.44 (19.7) | 41.06 (16.4)  | 41.82 (13.4) |
| <b>10-20</b>         | 19             | 2            | 1             | 1            |
| <b>20-30</b>         | 0              | 4            | 13            | 7            |
| <b>30-40</b>         | 0              | 5            | 8             | 2            |
| <b>40-50</b>         | 0              | 0            | 3             | 5            |
| <b>50-80</b>         | 0              | 8            | 11            | 7            |

**Table S3.** Sample demography of AMD gene expression dataset derived from human retinal pigment epithelium (RPE)/choroid tissues obtained from 9 AMD cases and 6 age-matched healthy controls, that were downloaded from the Gene Expression Omnibus (GEO; accession ID: GSE50195).

|                      | <b>Total</b> | <b>AMD</b>   | <b>Controls</b> |
|----------------------|--------------|--------------|-----------------|
| <b>N (Females)</b>   | 16 (8)       | 9 (5)        | 6 (3)           |
| <b>Age Mean (SD)</b> | 83.69 (6.01) | 84.22 (6.55) | 83.00 (5.66)    |

**Table S4.** Overview of the genetic variants used as instrumental variables for testing causal inference between AMD and COVID-19 traits (critical illness, hospitalization, and infection). We selected 23 uncorrelated (clumped at correlation threshold  $r^2 < 0.01$ ) and common (MAF > 5%) genetic variants as instrumental variables that were associated with AMD at a p-value level of  $5 \times 10^{-8}$  or smaller. The table additionally includes summary-level data (beta coefficients of genetic association, their standard error and corresponding p-value) for AMD as exposure and three COVID-19 phenotypes, including critical illness, hospitalization, and infections, as outcomes. CH: chromosome; EA: effect allele; EAF: effect allele frequency;  $\beta$ : effect estimate; SE: standard error.

| SNP         | CH | EA | EAF  | AMD     |      |                        | COVID-19<br>Critical Illness |      |      | COVID-19<br>Hospitalization |      |      | COVID-19<br>Infection |      |      |
|-------------|----|----|------|---------|------|------------------------|------------------------------|------|------|-----------------------------|------|------|-----------------------|------|------|
|             |    |    |      | $\beta$ | SE   | P                      | $\beta$                      | SE   | P    | $\beta$                     | SE   | P    | $\beta$               | SE   | P    |
| rs10801558  | 1  | G  | 0.33 | -0.96   | 0.02 | $2.5 \times 10^{-308}$ | -0.01                        | 0.03 | 0.58 | -0.02                       | 0.02 | 0.4  | -0.02                 | 0.01 | 0.09 |
| rs62247658  | 3  | T  | 0.45 | -0.13   | 0.02 | $1.8 \times 10^{-14}$  | -0.01                        | 0.03 | 0.72 | 0.02                        | 0.02 | 0.38 | 0.00                  | 0.01 | 0.99 |
| rs56339461  | 3  | G  | 0.16 | -0.13   | 0.02 | $2.6 \times 10^{-9}$   | 0.01                         | 0.05 | 0.86 | 0.01                        | 0.03 | 0.68 | 0.01                  | 0.01 | 0.36 |
| rs10033900  | 4  | C  | 0.49 | -0.14   | 0.02 | $5.4 \times 10^{-17}$  | 0.00                         | 0.03 | 0.86 | -0.02                       | 0.02 | 0.27 | -0.02                 | 0.01 | 0.08 |
| rs429608    | 6  | A  | 0.12 | -0.56   | 0.03 | $1.2 \times 10^{-103}$ | -0.01                        | 0.04 | 0.73 | 0.00                        | 0.03 | 0.94 | 0.00                  | 0.01 | 0.75 |
| rs7803454   | 7  | T  | 0.2  | 0.12    | 0.02 | $4.8 \times 10^{-9}$   | 0.00                         | 0.03 | 0.90 | 0.01                        | 0.02 | 0.57 | 0.02                  | 0.01 | 0.21 |
| rs1142      | 7  | T  | 0.36 | 0.10    | 0.02 | $1.4 \times 10^{-9}$   | 0.04                         | 0.03 | 0.14 | -0.02                       | 0.02 | 0.28 | -0.01                 | 0.01 | 0.58 |
| rs10781182  | 9  | G  | 0.32 | -0.11   | 0.02 | $2.6 \times 10^{-9}$   | -0.01                        | 0.04 | 0.77 | 0.02                        | 0.02 | 0.32 | 0.00                  | 0.01 | 0.67 |
| rs401186    | 9  | T  | 0.2  | -0.13   | 0.02 | $4.1 \times 10^{-10}$  | 0.07                         | 0.04 | 0.08 | 0.05                        | 0.03 | 0.07 | 0.01                  | 0.01 | 0.37 |
| rs11200633  | 10 | T  | 0.32 | 1.04    | 0.02 | $2.5 \times 10^{-308}$ | -0.03                        | 0.03 | 0.43 | -0.02                       | 0.02 | 0.28 | 0.00                  | 0.01 | 0.96 |
| rs11624933  | 14 | G  | 0.14 | 0.16    | 0.03 | $2.5 \times 10^{-10}$  | -0.01                        | 0.06 | 0.9  | 0.01                        | 0.03 | 0.70 | 0.01                  | 0.01 | 0.30 |
| rs61985136  | 14 | T  | 0.37 | 0.11    | 0.02 | $1.6 \times 10^{-10}$  | 0.05                         | 0.03 | 0.12 | 0.01                        | 0.02 | 0.57 | 0.02                  | 0.01 | 0.08 |
| rs2414577   | 15 | C  | 0.37 | -0.13   | 0.02 | $4.3 \times 10^{-15}$  | -0.02                        | 0.03 | 0.54 | -0.01                       | 0.02 | 0.79 | -0.01                 | 0.01 | 0.46 |
| rs1864163   | 16 | A  | 0.25 | -0.17   | 0.02 | $6.3 \times 10^{-19}$  | -0.04                        | 0.03 | 0.21 | -0.01                       | 0.02 | 0.63 | 0.00                  | 0.01 | 0.82 |
| rs72802342  | 16 | A  | 0.07 | -0.23   | 0.03 | $5.0 \times 10^{-12}$  | 0.01                         | 0.07 | 0.84 | 0.04                        | 0.04 | 0.25 | 0.01                  | 0.02 | 0.45 |
| rs11080055  | 17 | C  | 0.48 | 0.09    | 0.02 | $1.0 \times 10^{-8}$   | -0.01                        | 0.03 | 0.85 | 0.01                        | 0.02 | 0.63 | 0.02                  | 0.01 | 0.11 |
| rs6565597   | 17 | T  | 0.39 | 0.12    | 0.02 | $1.5 \times 10^{-11}$  | -0.05                        | 0.04 | 0.20 | 0.00                        | 0.02 | 0.97 | 0.00                  | 0.01 | 0.99 |
| rs9973159   | 18 | T  | 0.13 | -0.13   | 0.02 | $9.4 \times 10^{-8}$   | 0.00                         | 0.05 | 0.98 | -0.02                       | 0.03 | 0.52 | 0.00                  | 0.01 | 0.81 |
| rs11569415  | 19 | A  | 0.24 | 0.34    | 0.02 | $5.4 \times 10^{-67}$  | 0.01                         | 0.05 | 0.86 | 0.00                        | 0.03 | 0.87 | 0.00                  | 0.01 | 0.77 |
| rs6073984   | 20 | G  | 0.13 | -0.15   | 0.02 | $3.4 \times 10^{-10}$  | 0.03                         | 0.04 | 0.45 | 0.02                        | 0.03 | 0.37 | 0.01                  | 0.01 | 0.45 |
| rs117739907 | 20 | T  | 0.06 | -0.28   | 0.03 | $3.2 \times 10^{-16}$  | 0.05                         | 0.05 | 0.33 | 0.03                        | 0.04 | 0.35 | 0.02                  | 0.02 | 0.35 |
| rs5754227   | 22 | C  | 0.12 | -0.26   | 0.03 | $1.1 \times 10^{-24}$  | -0.01                        | 0.04 | 0.79 | 0.00                        | 0.03 | 0.97 | 0.00                  | 0.01 | 0.93 |
| rs8135665   | 22 | T  | 0.21 | 0.13    | 0.02 | $5.6 \times 10^{-11}$  | 0.04                         | 0.03 | 0.20 | 0.04                        | 0.02 | 0.10 | 0.00                  | 0.01 | 0.87 |

**Table S5.** Overview of the genetic variants used as instrumental variables for testing causal inference between the human cytokine Pdgfbp level and COVID-19 outcomes. We selected 4 uncorrelated (clumped at correlation threshold  $r^2 < 0.01$ ) and common (MAF > 5%) genetic variants as instrumental variables that were associated with the Pdgfbp levels at a p-value level of  $9 \times 10^{-8}$  or smaller. The table additionally includes summary-level data (beta coefficients of genetic association, their standard error and corresponding p-value) for Pdgfbp as exposure and three COVID-19 phenotypes, including critical illness, hospitalization, and infections, as outcomes. CH: chromosome; EA: effect allele; EAF: effect allele frequency;  $\beta$ : effect estimate; SE: standard error.

| SNP        | CH | EA | EAF  | Pdgfbp  |      |                       | Critical Illness |      |      | Hospitalization |      |      | Infection |      |      |
|------------|----|----|------|---------|------|-----------------------|------------------|------|------|-----------------|------|------|-----------|------|------|
|            |    |    |      | $\beta$ | SE   | P                     | $\beta$          | SE   | P    | $\beta$         | SE   | P    | $\beta$   | SE   | P    |
| rs727770   | 2  | G  | 0.11 | 0.11    | 0.02 | $9.0 \times 10^{-8}$  | -0.03            | 0.04 | 0.48 | -0.01           | 0.03 | 0.65 | 0.02      | 0.01 | 0.02 |
| rs13412535 | 2  | G  | 0.22 | -0.34   | 0.02 | $2.5 \times 10^{-55}$ | -0.02            | 0.03 | 0.44 | 0.00            | 0.02 | 0.83 | -0.01     | 0.01 | 0.42 |
| rs2324229  | 6  | C  | 0.36 | -0.09   | 0.02 | $3.5 \times 10^{-8}$  | -0.03            | 0.03 | 0.20 | -0.03           | 0.02 | 0.15 | 0.00      | 0.01 | 0.94 |
| rs4965869  | 15 | C  | 0.26 | -0.18   | 0.02 | $5.7 \times 10^{-24}$ | -0.02            | 0.04 | 0.62 | -0.01           | 0.02 | 0.54 | 0.00      | 0.01 | 0.98 |

**Table S6.** Summary statistics of genome-wide significant ( $P < 5.0 \times 10^{-8}$ ) associations in the MTAG results of AMD and the three COVID-19 outcomes (critical illness, hospitalization, and infections).

Enclosed electronic excel file

**Table S7.** eQTL association summaries of rs130651 and rs482037 with *CACNA1I* in the whole bloods of the GTEx portal database.

| Gene           | SNP      | Effect Allele | T-statistics | P-Value              |
|----------------|----------|---------------|--------------|----------------------|
| <i>CACNA1I</i> | rs130651 | A             | 3.8          | 1.4x10 <sup>-4</sup> |
|                | rs482037 | T             | 2.3          | 0.02                 |

**Table S8.** Summary statistics of *cis*-mQTL associations between the two SNPs (rs130651 and rs4820371) and CpGs located upstream of *PDGFB* (chr22:39619364-39640987) in the GoDMC database (<http://www.godmc.org.uk>).

| SNP       | EA | CpG ID     | CpG BP*        | Distance<br>from PDGFB | Effect | SE   | N     | P                      |
|-----------|----|------------|----------------|------------------------|--------|------|-------|------------------------|
| rs130651  | A  | cg01416388 | chr22:39784597 | 143610                 | -0.12  | 0.01 | 19065 | 5.18x10 <sup>-28</sup> |
|           |    | cg05872129 | chr22:39784768 | 143781                 | -0.15  | 0.01 | 19065 | 9.23x10 <sup>-43</sup> |
|           |    | cg24399712 | chr22:39784795 | 143808                 | -0.15  | 0.01 | 19065 | 2.73x10 <sup>-43</sup> |
|           |    | cg11247378 | chr22:39784981 | 143994                 | -0.18  | 0.01 | 19065 | 9.74x10 <sup>-64</sup> |
| rs4820371 | T  | cg01093212 | chr22:39715155 | 74168                  | -0.11  | 0.01 | 17974 | 1.54x10 <sup>-19</sup> |
|           |    | cg17798944 | chr22:39715224 | 74237                  | -0.18  | 0.01 | 16372 | 1.55x10 <sup>-45</sup> |
|           |    | cg02038168 | chr22:39784480 | 143493                 | -0.12  | 0.01 | 17974 | 2.10x10 <sup>-21</sup> |
|           |    | cg01416388 | chr22:39784597 | 143610                 | -0.14  | 0.01 | 17974 | 1.91x10 <sup>-29</sup> |
|           |    | cg05872129 | chr22:39784768 | 143781                 | -0.16  | 0.01 | 17974 | 3.92x10 <sup>-41</sup> |
|           |    | cg24399712 | chr22:39784795 | 143808                 | -0.16  | 0.01 | 17974 | 5.17x10 <sup>-41</sup> |
|           |    | cg11247378 | chr22:39784981 | 143994                 | -0.20  | 0.01 | 17974 | 5.99x10 <sup>-60</sup> |

EA: effect allele. CHR: chromosome. BP: base pair position. SE: standard error. N: sample size. \*The gene and CpG sites are mapped to the human genome reference build 37.



**Table S9.** Association summaries for differential gene expression analysis of *PDGFB* in the RNS-Seq data of bloods from COVID-19 patients in three different stages measured from the symptom onset (early  $\leq 10$  days, middle 11-20 days, late  $\geq 21$  days). This COVID-19 RNA-Seq data was obtained from Gene Expression Omnibus (GEO; accession ID: GSE161731).

| Age group | Middle vs. Early |      |      | Middle/Late vs. Early |      |      |
|-----------|------------------|------|------|-----------------------|------|------|
|           | FC               | t    | P    | FC                    | t    | P    |
| All       | 0.99             | 0.52 | 0.61 | 0.93                  | 0.24 | 0.81 |
| > 30      | 1.02             | 1.02 | 0.31 | 0.92                  | 0.49 | 0.62 |
| > 40      | 2.17             | 2.34 | 0.03 | 2.04                  | 1.67 | 0.10 |
| > 50      | 2.15             | 2.19 | 0.04 | 1.94                  | 1.36 | 0.19 |

FC: fold change of *PDGFB* expression level between the two groups

**Table S10.** The gene ontology (GO) analysis of the MTAG Result from AMD and the COVID-19 infection. This GO Analysis was conducted using the MAGMA software. The gene-set association significance threshold is set to  $8.45 \times 10^{-6}$ .

| Gene Set                                                          | N Genes | Infection |      |                       |
|-------------------------------------------------------------------|---------|-----------|------|-----------------------|
|                                                                   |         | Beta      | SE   | P                     |
| High density lipoprotein particle remodeling                      | 16      | 1.38      | 0.25 | $1.71 \times 10^{-8}$ |
| Reverse cholesterol transport                                     | 16      | 1.23      | 0.26 | $1.53 \times 10^{-6}$ |
| Humoral immune response mediated<br>by circulating immunoglobulin | 44      | 0.71      | 0.16 | $4.31 \times 10^{-6}$ |
| Extracellular structure organization                              | 396     | 0.20      | 0.05 | $3.53 \times 10^{-6}$ |

**Table S11.** Mendelian randomization associations between AMD and Pdgf-bb as exposures and the COVID-19 (critical illness, hospitalization, and infection) as outcomes using pleiotropy-robust Mendelian randomization approaches including weighted median (WM) and MR-Egger. The intercept of the MR-Egger method was used to test for directional pleiotropy. The estimates are odd ratios for AMD and AMD (complement) and beta for Pdgf-bb.

| Exposure         | Outcome          | MR Method            | Estimates | 95% CI         | P-value      |
|------------------|------------------|----------------------|-----------|----------------|--------------|
| AMD              | Critical Illness | WM                   | 1.00      | (0.95 - 1.05)  | 0.97         |
|                  |                  | MR-Egger (intercept) | 0.98      | (0.93 - 1.03)  | 0.40 (0.35)  |
|                  | Hospitalization  | WM                   | 1.00      | (0.97 - 1.03)  | 0.98         |
|                  |                  | MR-Egger (intercept) | 1.00      | (0.95 - 1.05)  | 0.90 (0.88)  |
|                  | Infection        | WM                   | 1.00      | (0.98 - 1.02)  | 1.00         |
|                  |                  | MR-Egger (intercept) | 1.00      | (0.99 - 1.02)  | 0.65 (0.70)  |
| AMD (Complement) | Critical Illness | WM                   | 1.01      | (0.96 - 1.07)  | 0.69         |
|                  |                  | MR-Egger (intercept) | 1.02      | (0.97 - 1.07)  | 0.44 (0.76)  |
|                  | Hospitalization  | WM                   | 1.02      | (0.98 - 1.06)  | 0.38         |
|                  |                  | MR-Egger (intercept) | 1.01      | (0.98 - 1.03)  | 0.64 (0.14)  |
|                  | Infection        | WM                   | 1.01      | (0.99 - 1.03)  | 0.16         |
|                  |                  | MR-Egger (intercept) | 1.00      | (0.97 - 1.02)  | 0.84 (0.052) |
| Pdgf-bb          | Critical Illness | WM                   | 0.07      | (-0.10 - 0.23) | 0.42         |
|                  |                  | MR-Egger (intercept) | 0.03      | (-0.14 - 0.20) | 0.72 (0.76)  |
|                  | Hospitalization  | WM                   | 0.01      | (-0.09 - 0.12) | 0.80         |
|                  |                  | MR-Egger (intercept) | -0.08     | (-0.17 - 0.01) | 0.08 (0.16)  |
|                  | Infection        | WM                   | 0.02      | (-0.03 - 0.08) | 0.37         |
|                  |                  | MR-Egger (intercept) | 0.01      | (-0.06 - 0.07) | 0.85 (0.54)  |

CI: Confidence interval. WM: Weighted median.

**Table S12.** Association summaries of the human cytokine Pdgfb levels between COVID-19 cases and controls. The positive effect direction means that the mean levels of the cytokine Pdgfb were higher in the cases compared to the controls.

| Study                      | PMID         | COVID-19 Cases (#)           | COVID-19 free Controls | Effect direction | P-value |
|----------------------------|--------------|------------------------------|------------------------|------------------|---------|
| <i>Huang et al.</i> 2020   | 3198626<br>4 | ICU-Care COVID-19 cases (13) | 28                     | +                | 0.013   |
| <i>Huang et al.</i> 2020   | 3198626<br>4 | No ICU COVID-19 cases (28)   | 28                     | +                | 0.009   |
| <i>Petrey et al.</i> 2021* | 3293045<br>6 | COVID-19 cases (22)          | 22                     | +                | <0.001  |

\**Petrey et al.* analyzed the cytokine Pdgf-bb together with Pdgf-ab. PMID: PubMed accession ID.

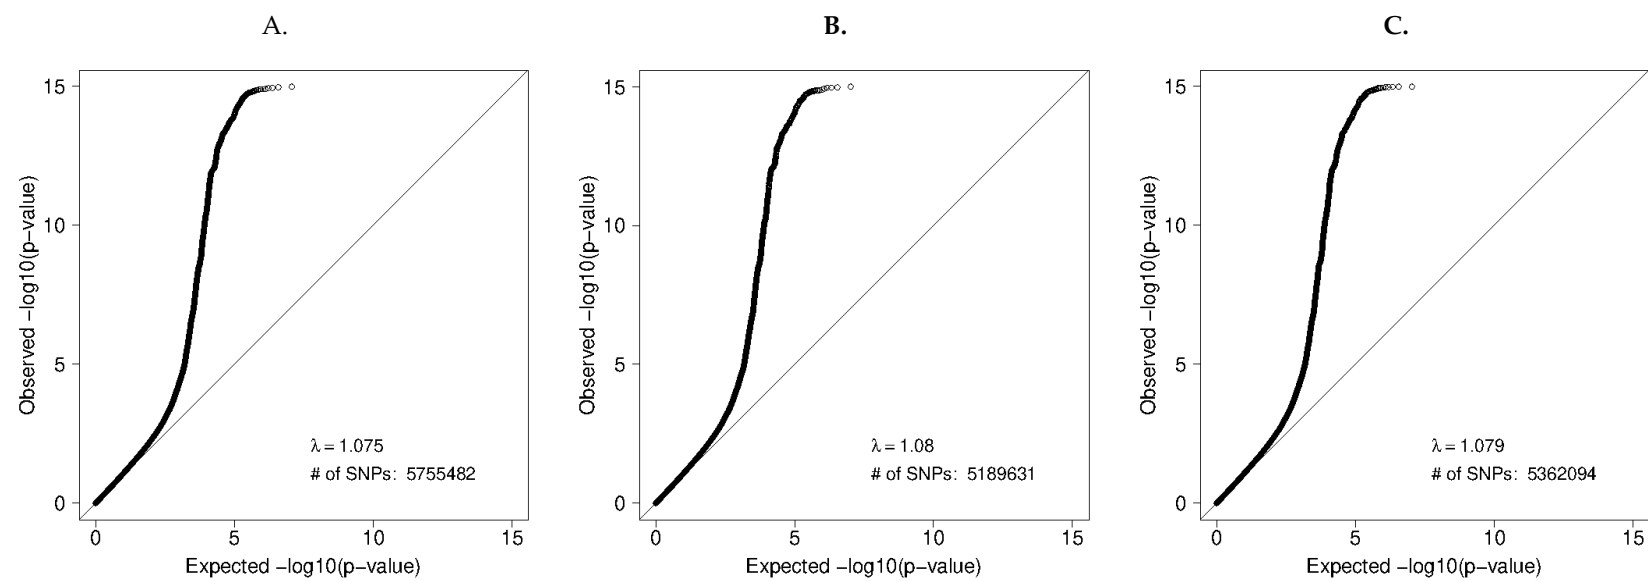

**Figure S1.** QQ plots of the MTAG results for AMD with the three COVID-19 outcomes: **A.** critical illness, **B.** hospitalization, and **C.** infections.

A.

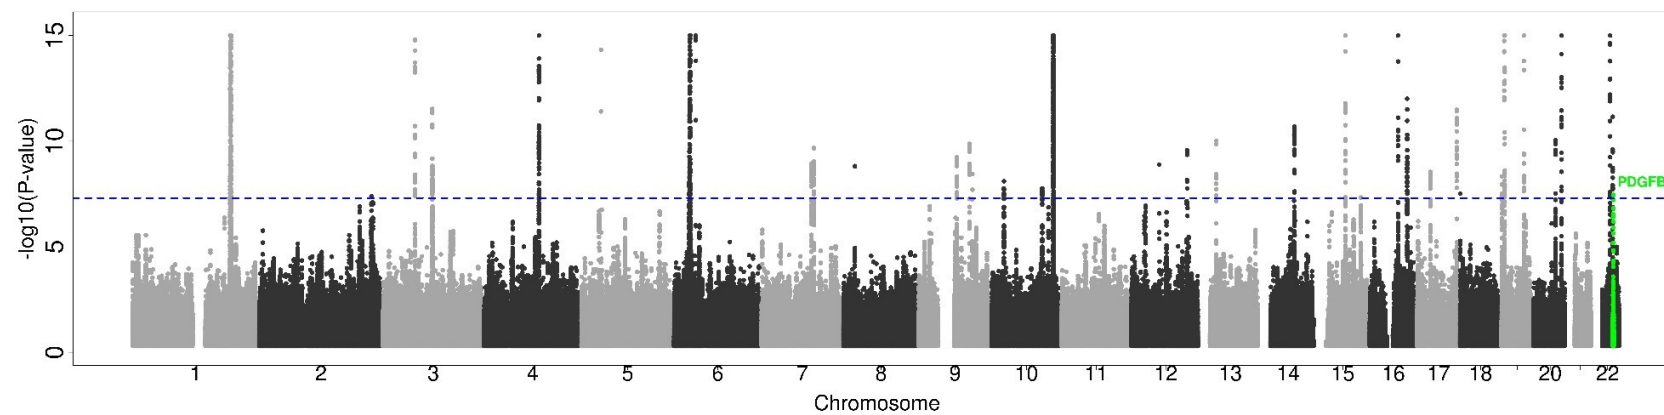

B.

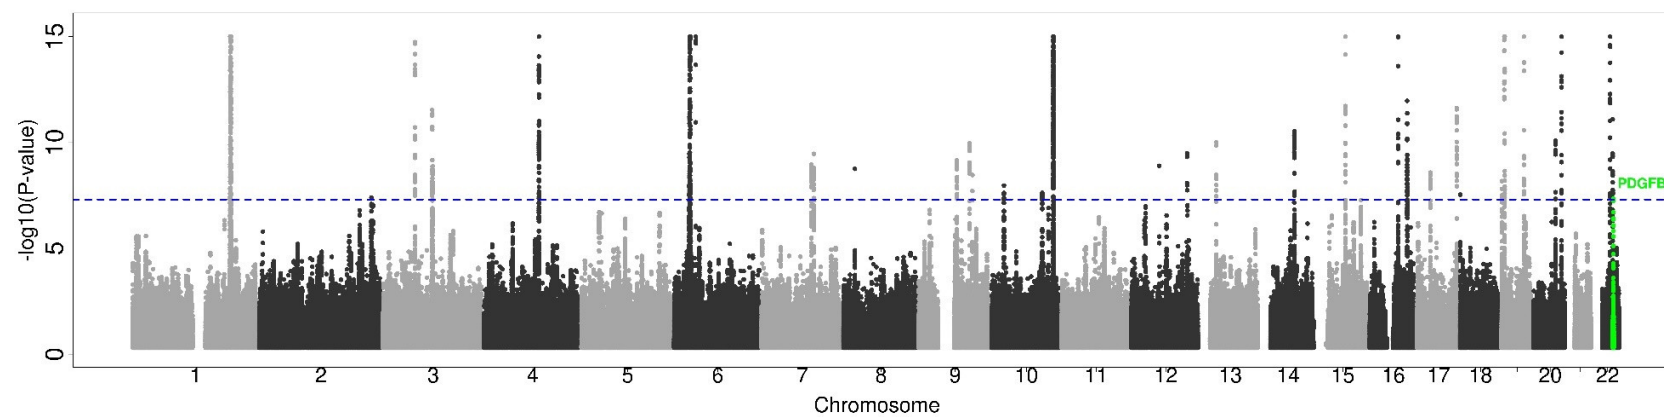

C.

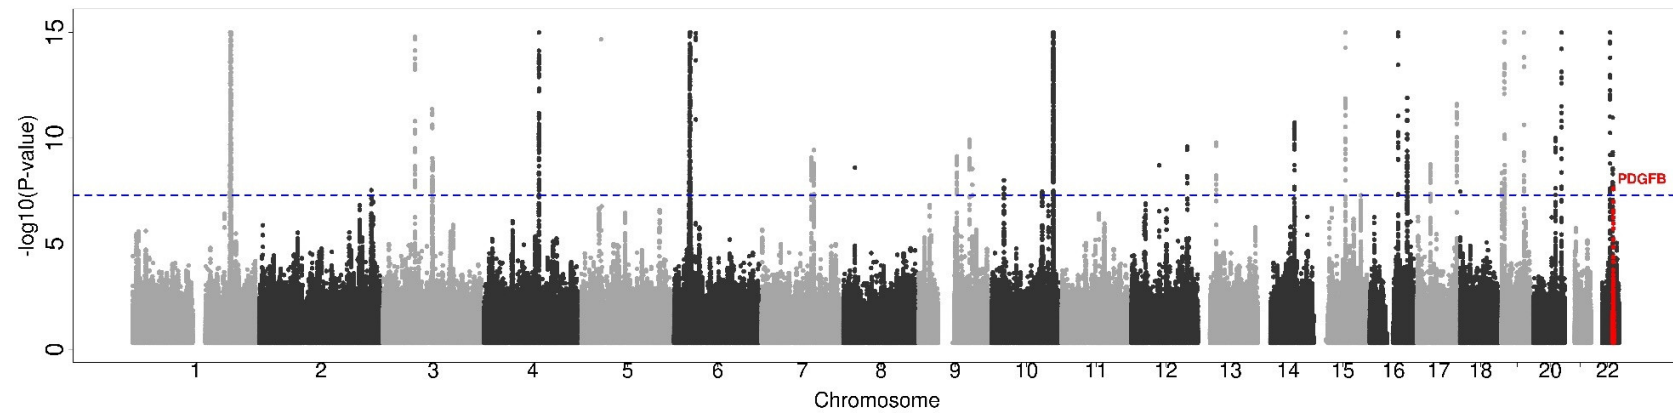

**Figure S2.** Manhattan plots of the MTAG results for AMD with the three COVID-19 outcomes: **A.** critical illness, **B.** hospitalization, and **C.** infections.

A. critical illness, B. hospitalization, and C. infections

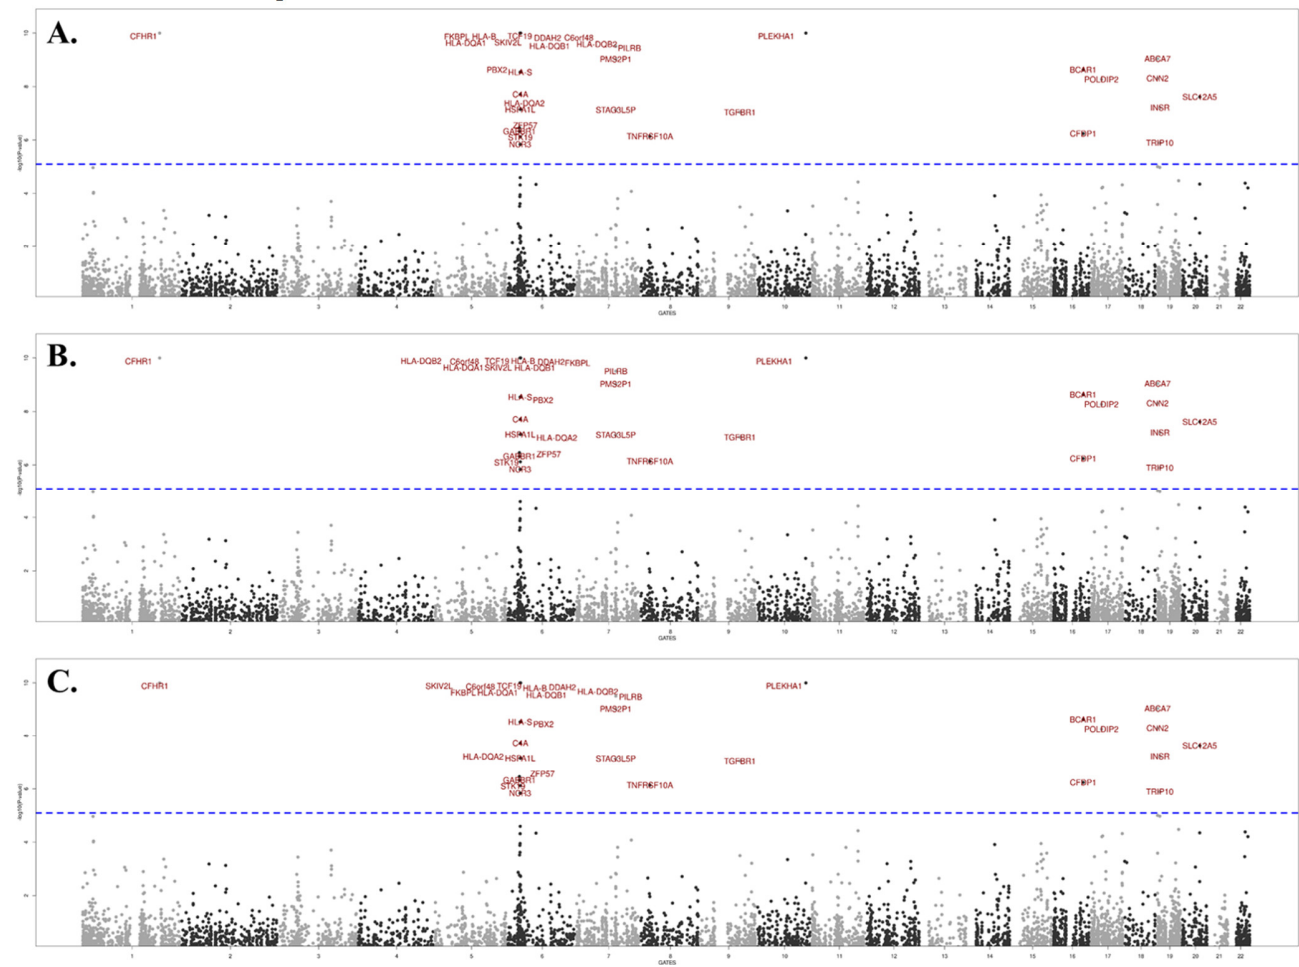

Figure S3. Manhattan plots of S-Predixcan results in the blood tissue using the MTAG results for AMD with the three COVID-19 outcomes including.



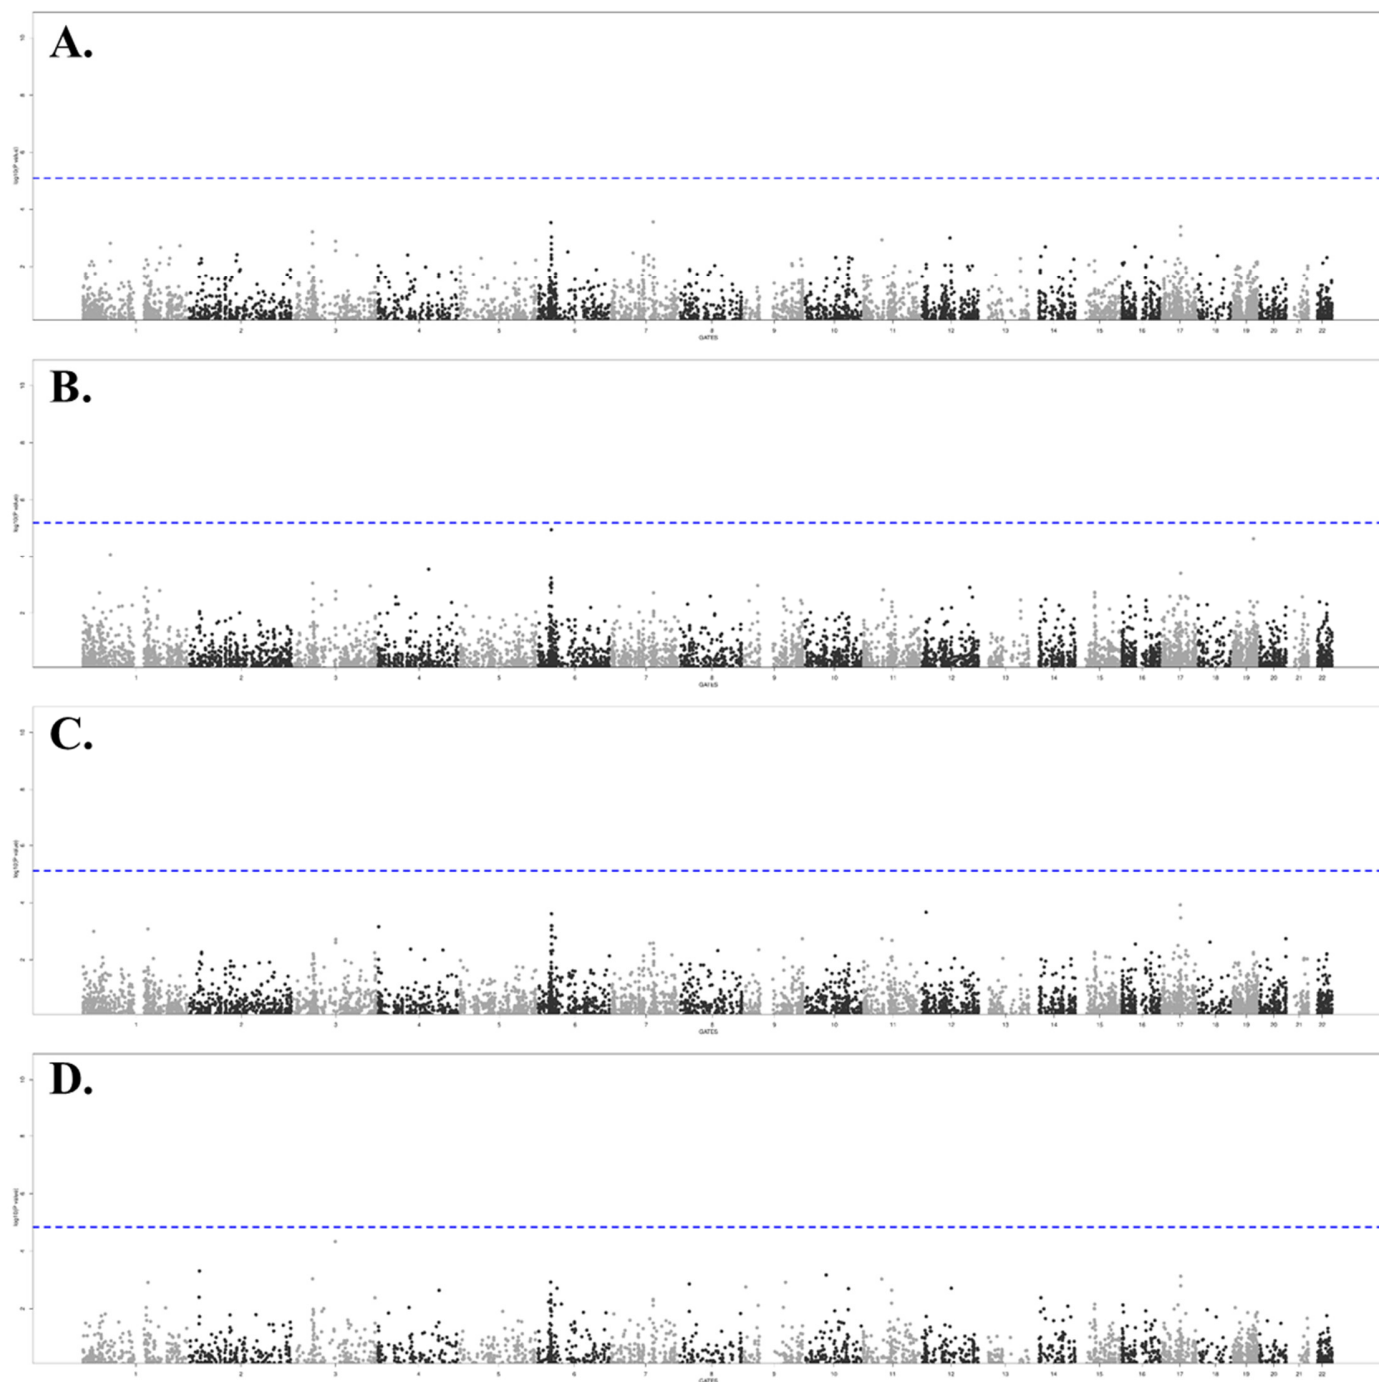

**Figure S4.** Manhattan plots of S-Predixcan results in **A.** bloods, **B.** lung, **C.** aorta (artery) and **D.** coronary (artery) using the MTAG results for AMD with the COVID-19 critical illness.

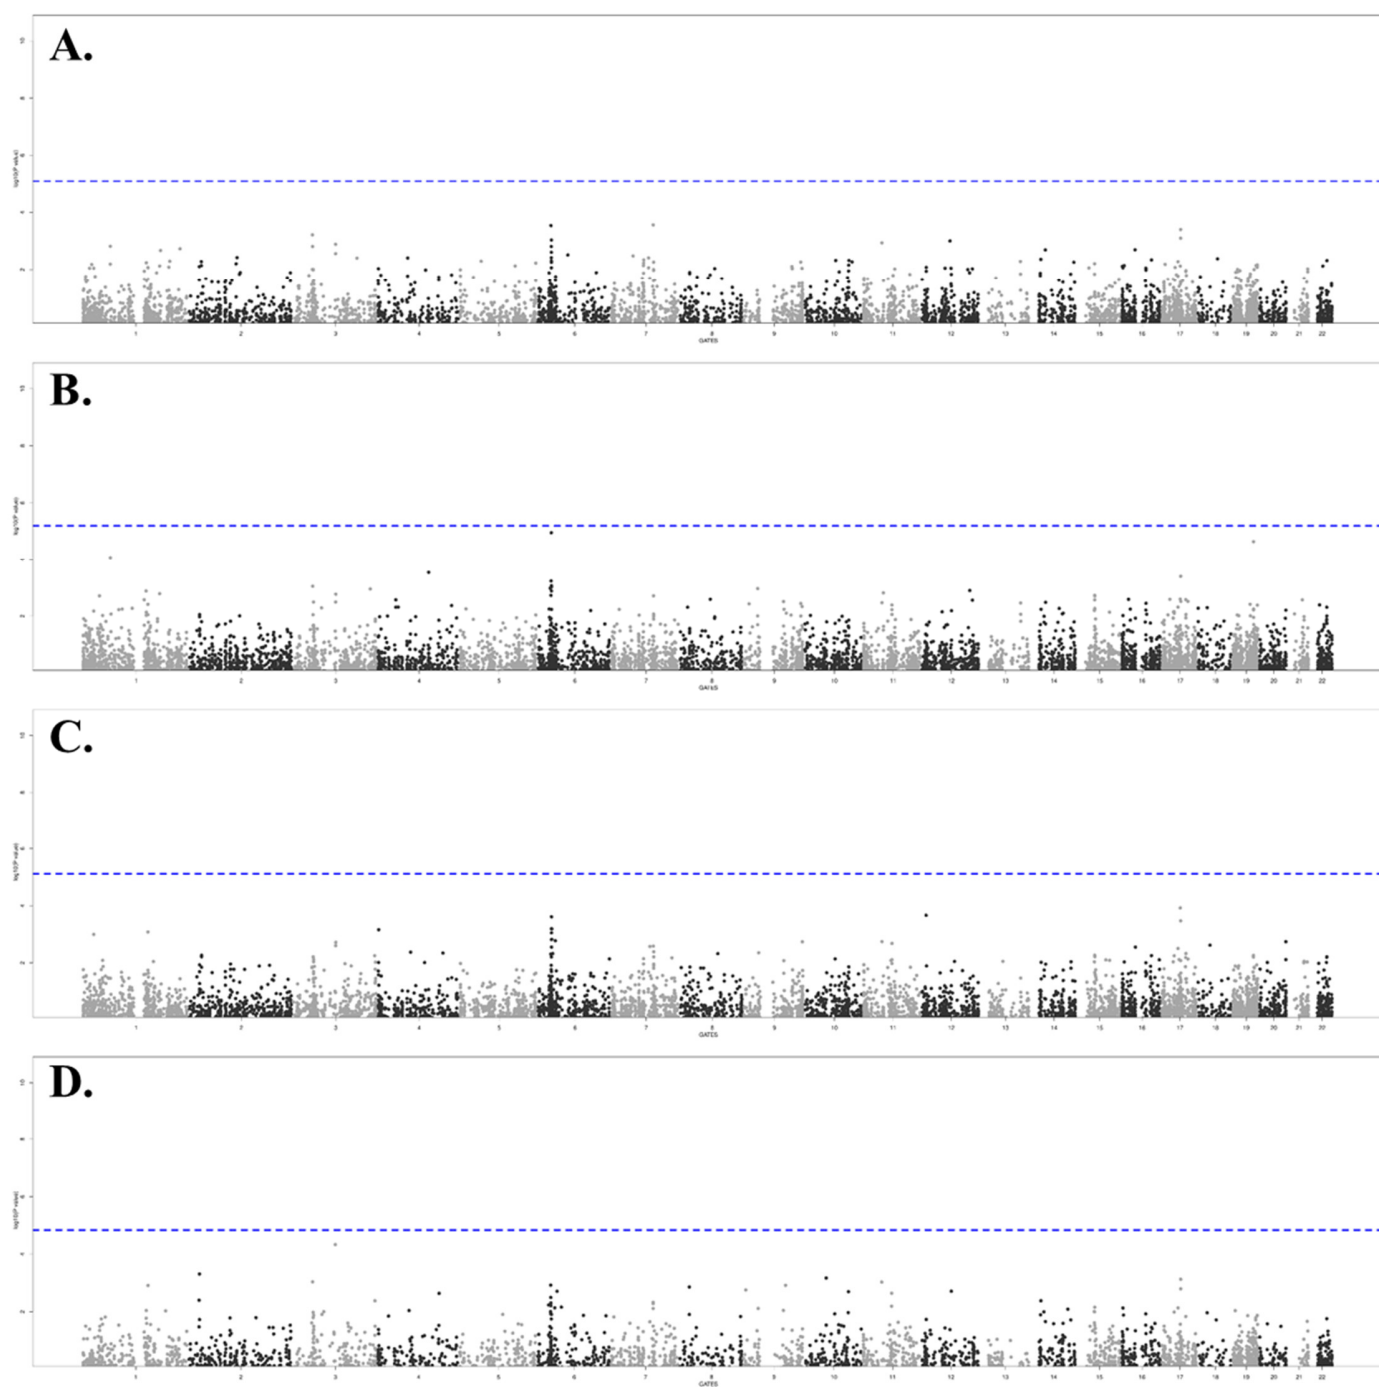

**Figure S5.** Manhattan plots of S-Predixcan results in **A.** bloods, **B.** lung, **C.** aorta (artery) and **D.** coronary (artery) using the MTAG results for AMD with the COVID-19 hospitalization.



**Figure S6.** Manhattan plots of S-Predixcan results in **A.** bloods, **B.** lung, **C.** aorta (artery) and **D.** coronary (artery) using the MTAG results for AMD with the COVID-19 infection.

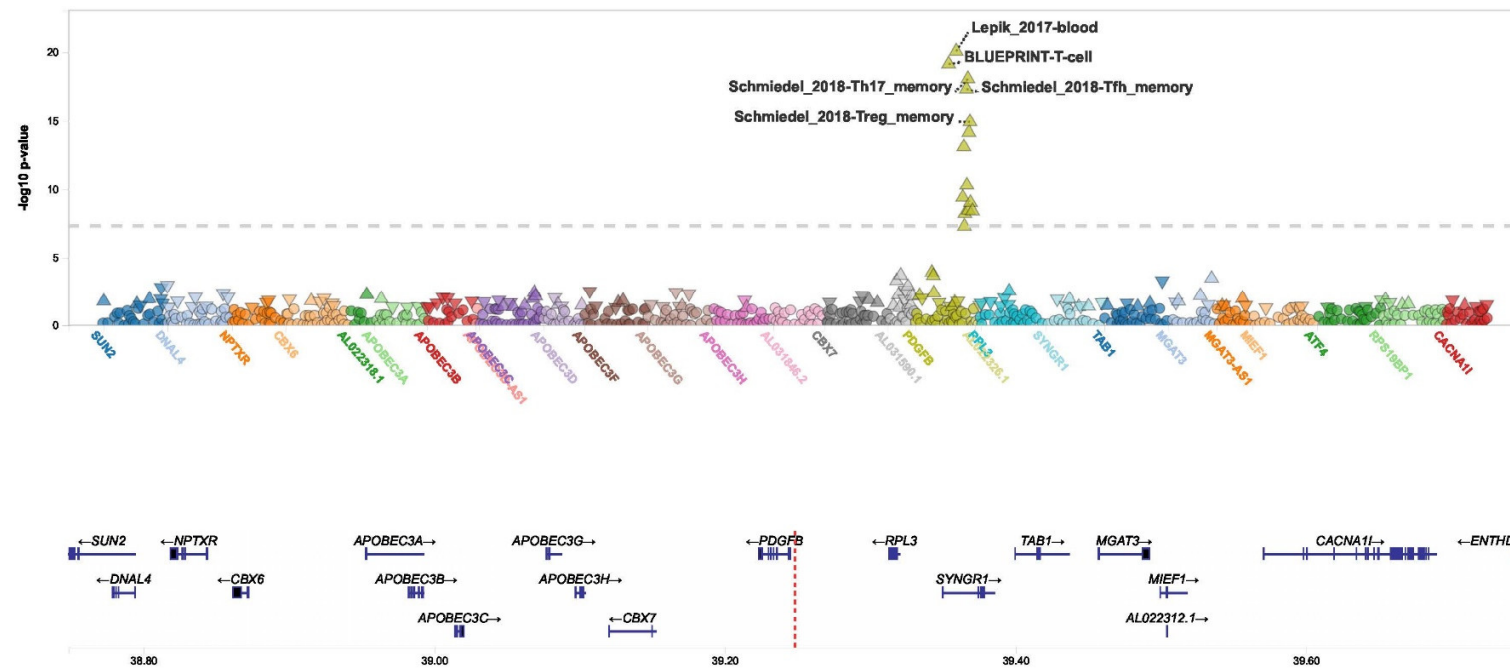

A.

B.

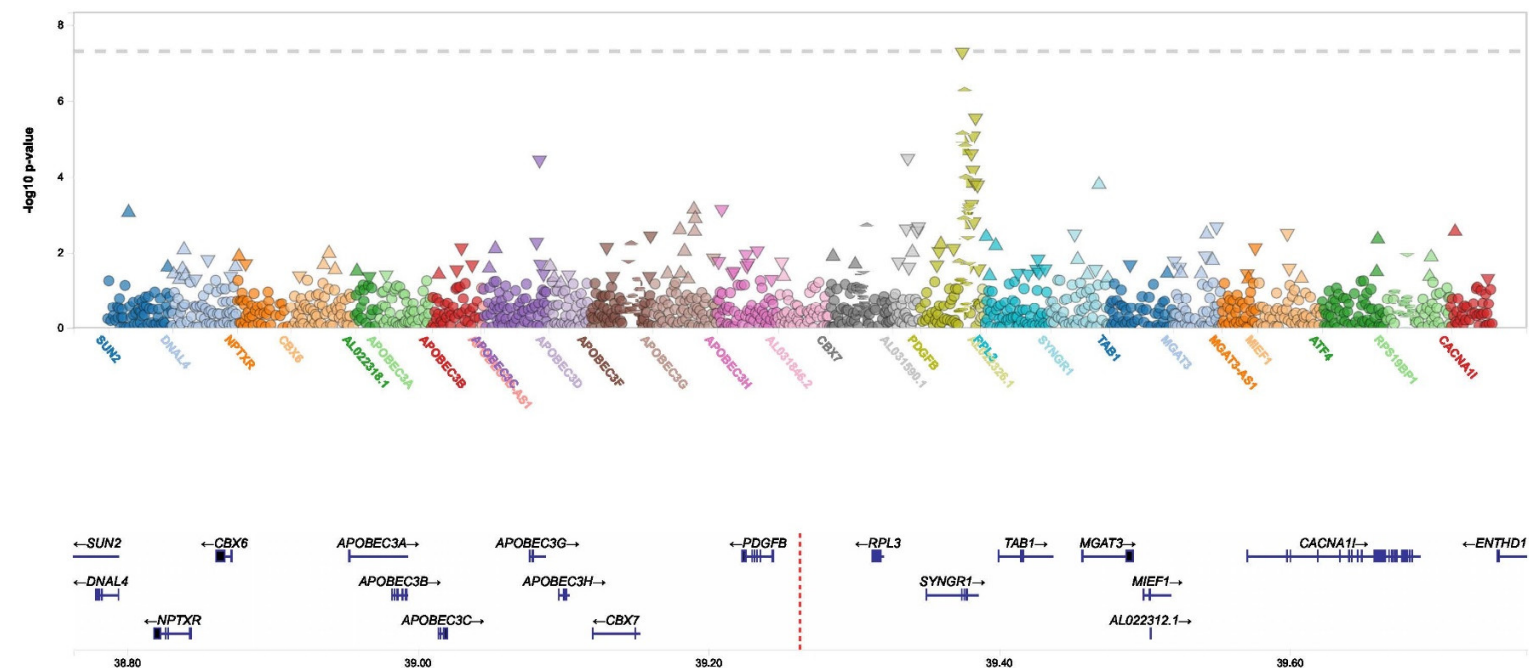

**Figure S7.** The eQTL P-values from the FIVEx database (<https://fivex.sph.umich.edu>) of **A.** rs130651 and **B.** rs4820371 with the genes located 500 kilobase pairs from the SNPs. These SNPs are significant cis-eQTLs for regulating *PDGFB* only. We exclude the non-coding genes. The red vertical dot lines indicate the locations of the SNPs. The top eQTL summary statistics are presented in Table 2.

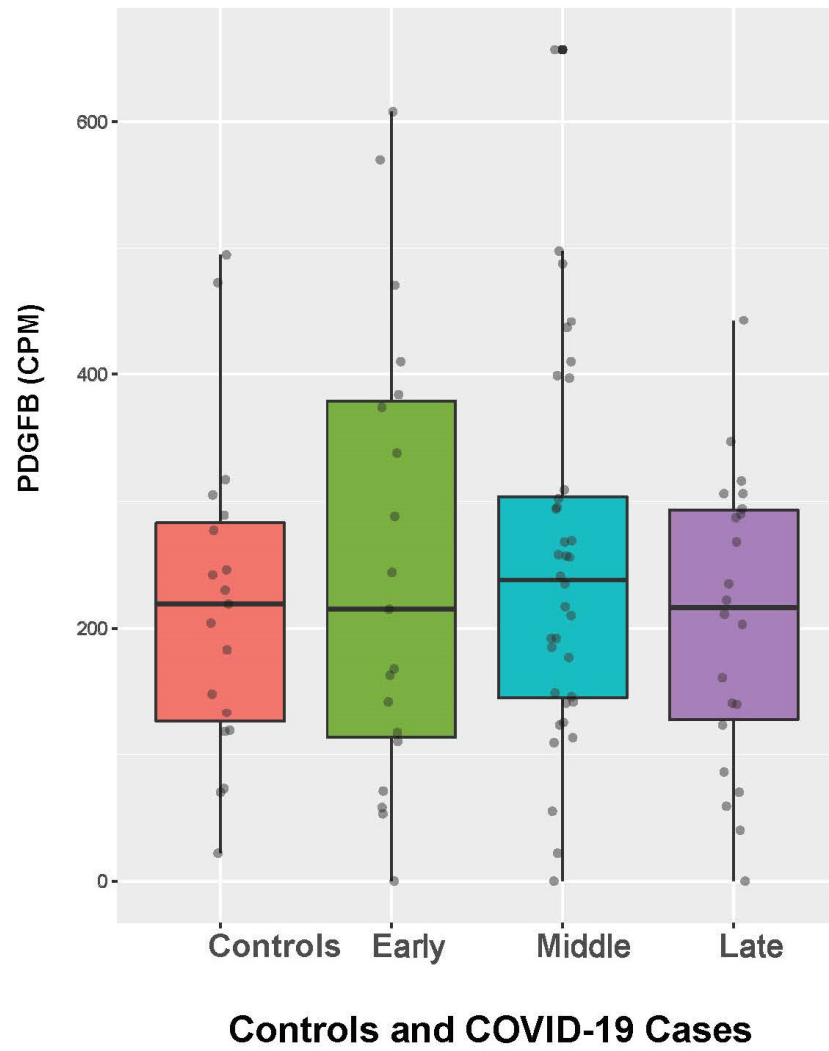

**Figure S8.** *PDGFB* gene expression levels across COVID-19-free controls and COVID-19 patients in the three different stages by the time after the symptom onset (early  $\leq 10$  days, middle 11-20 days, late  $\geq 21$  days). The Y-axis is the *PDGFB* gene expression level in the counts-per-million (CPM) unit.

A.

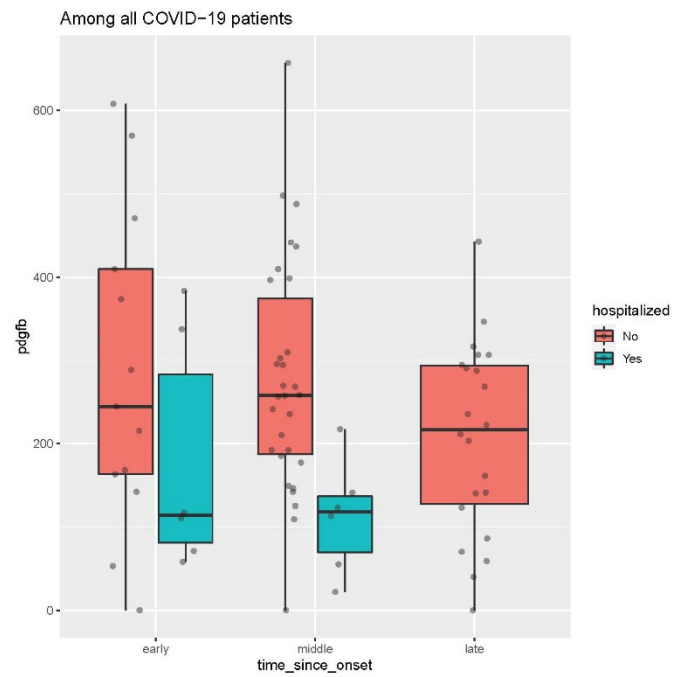

**B.**

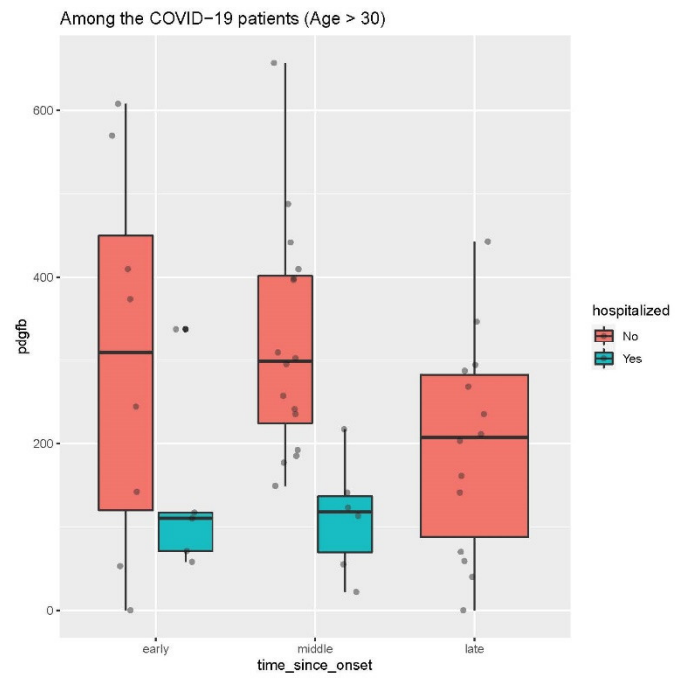



C.

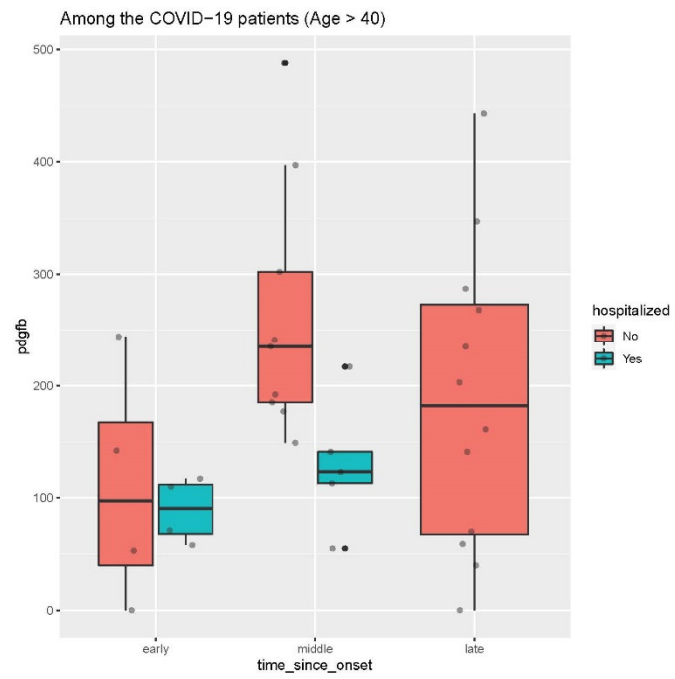

D.

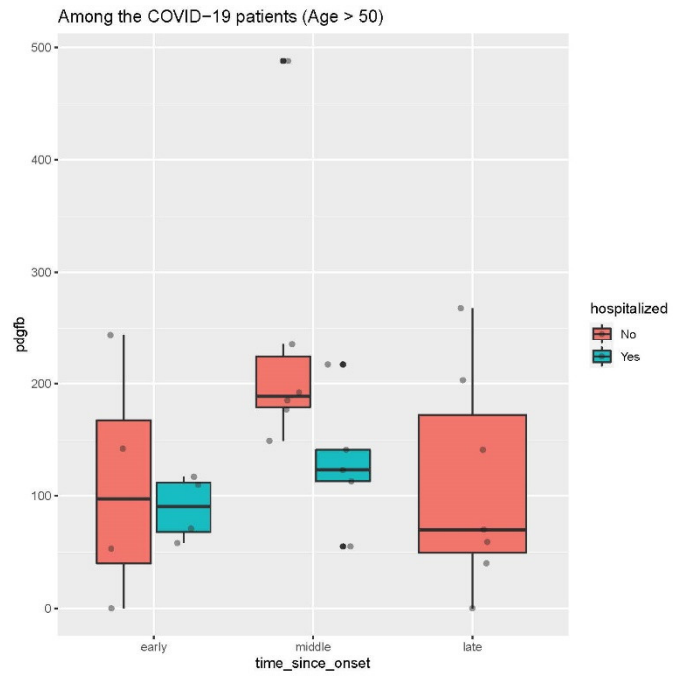

**Figure S9.** PDGFB gene expression levels at the three different stages of COVID-19 by the time after the symptom onset (early  $\leq 10$  days, middle 11-20 days, late  $\geq 21$  days) in different age groups: **A.** all sample, **B.** age > 30, **C.** age > 40, and **D.** age > 50.
